# Supplementary material for: Whole genome sequencing of a natural recombinant Toxoplasma gondii strain reveals chromosome sorting and local allelic variants
Source: PubMed Central journal article supplement (PMC2718519; doi:10.1186/gb-2009-10-5-r53), 2009-05-20

### **Additional data file 1.**

Graphs showing the distribution of SNPs called from the 454 whole genome sequencing of the recombinant Ugandan *Toxoplasma gondii* strain TgCkUg2 in the comparison with Me49 (type II), VEG (type III) or both.

Green colour indicates SNPs where TgCkUg2 is identical to Me49 (type II background), blue indicates SNPs where TgCkUg2 is identical to VEG (type III background), and orange SNPs represent novel polymorphisms, where TgCkUg2 had a different allele from both Me49 and VEG. The number of SNPs of each kind is shown for all chromosomes in intervals of 10 kb.

# Chromosome Ia

- Type II
- Type III
- New SNPs

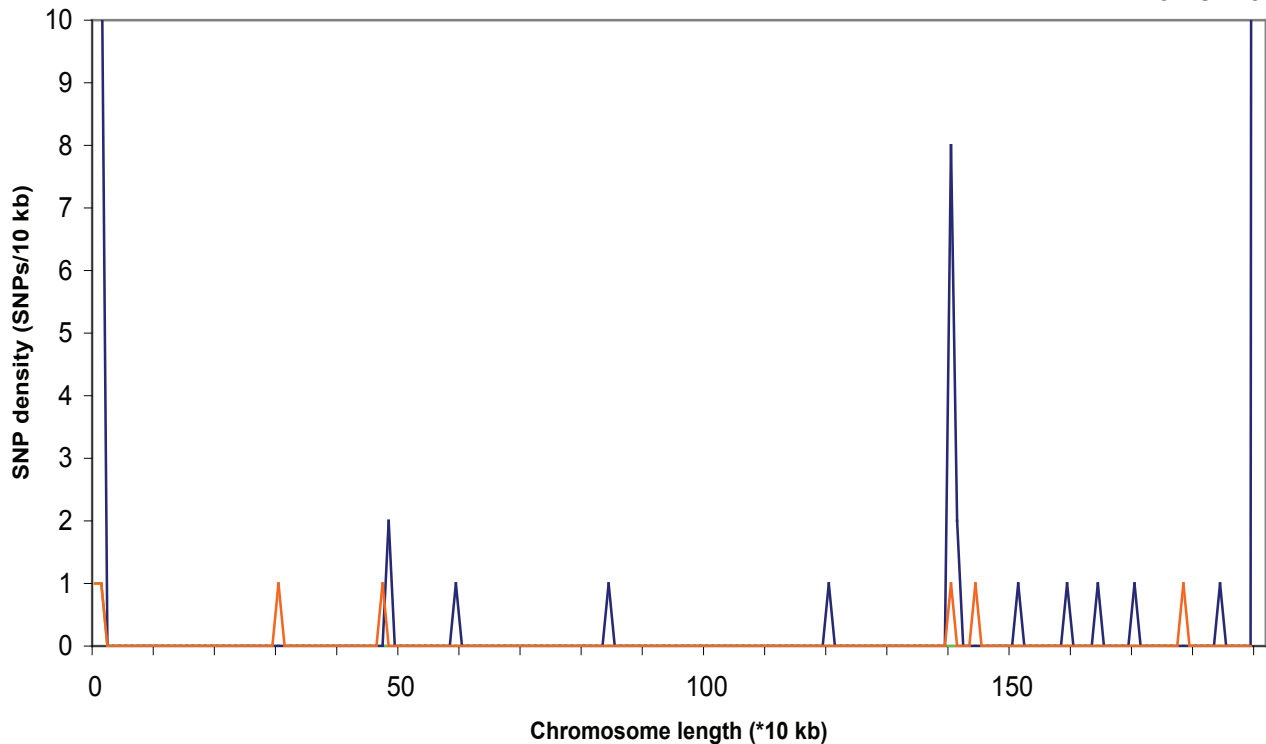

# Chromosome 1b

- Type II
- Type III
- New SNPs

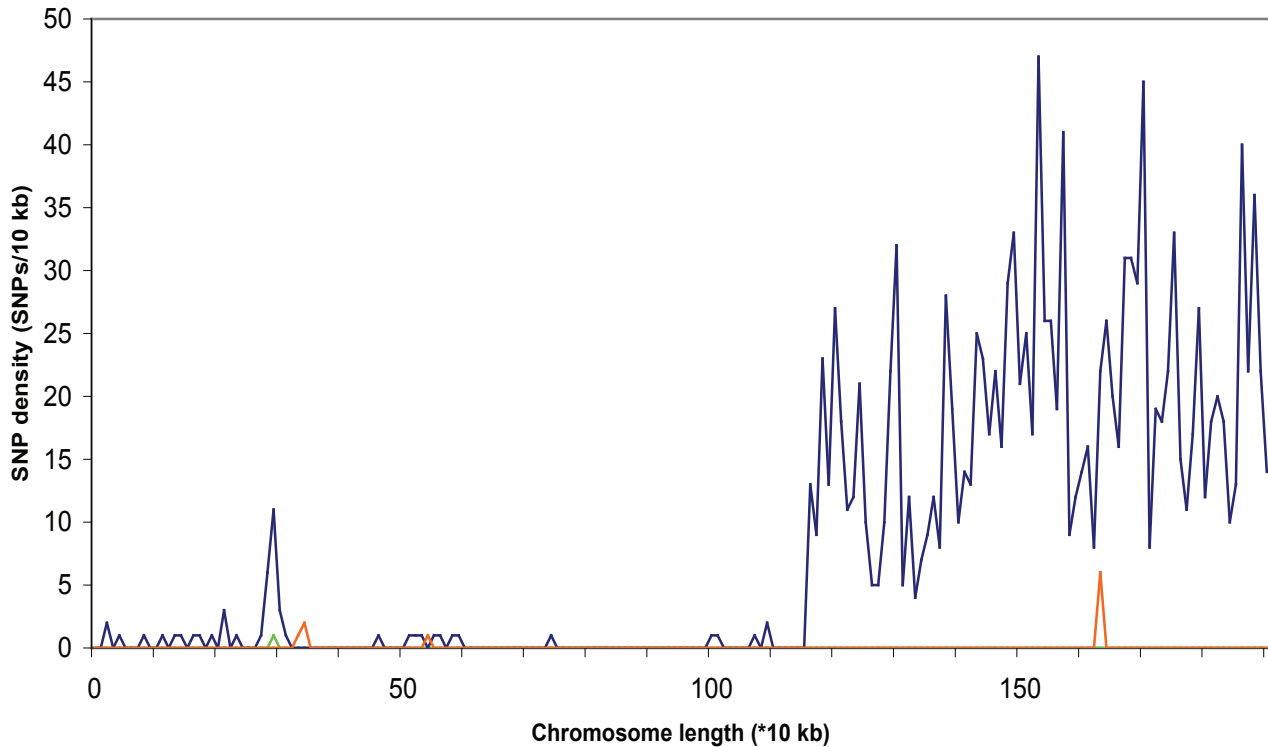

# Chromosome II

- Type II
- Type III
- New SNPs

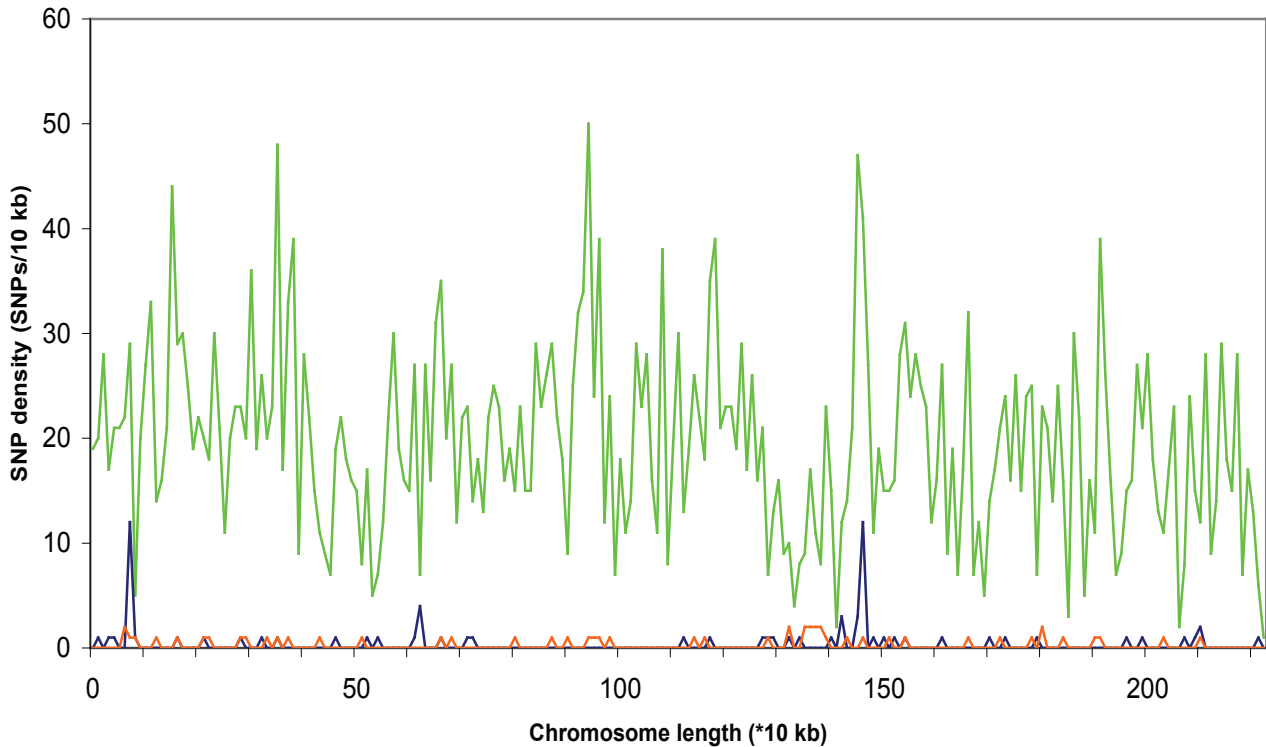

# Chromosome III

- Type II
- Type III
- New SNPs

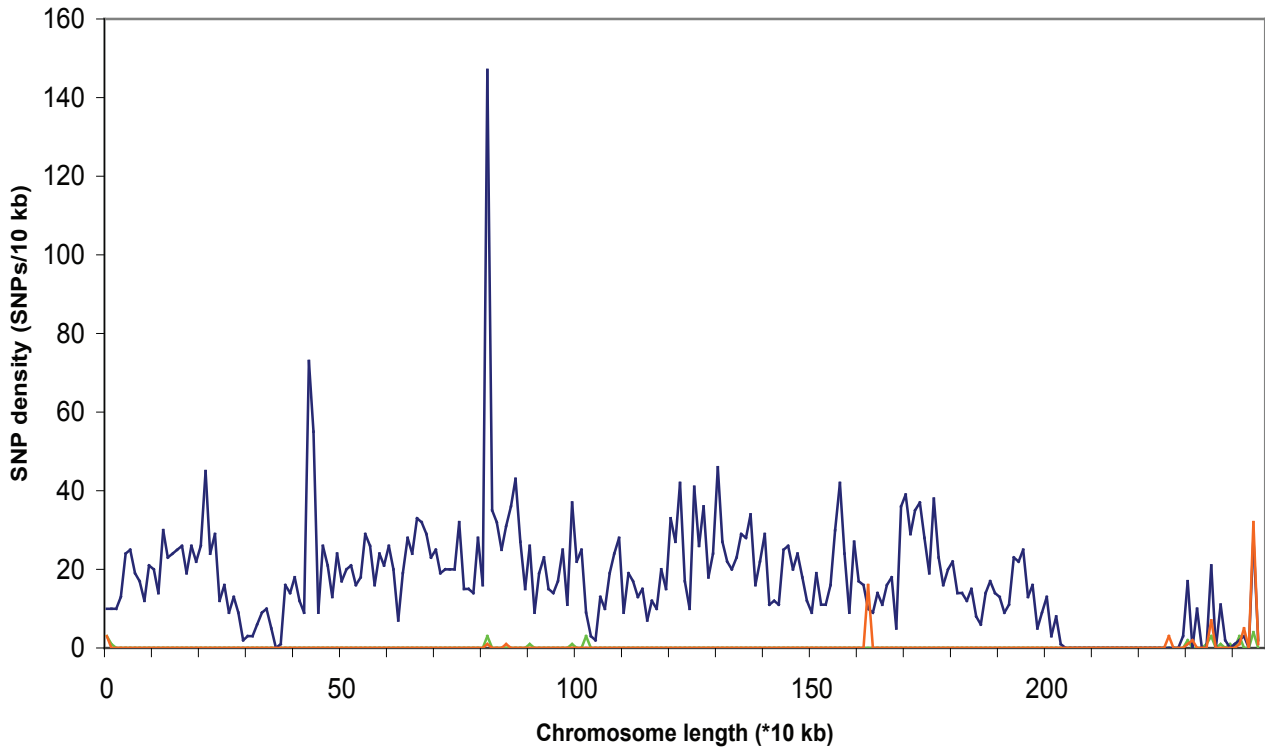

# Chromosome IV

- Type II
- Type III
- New SNPs

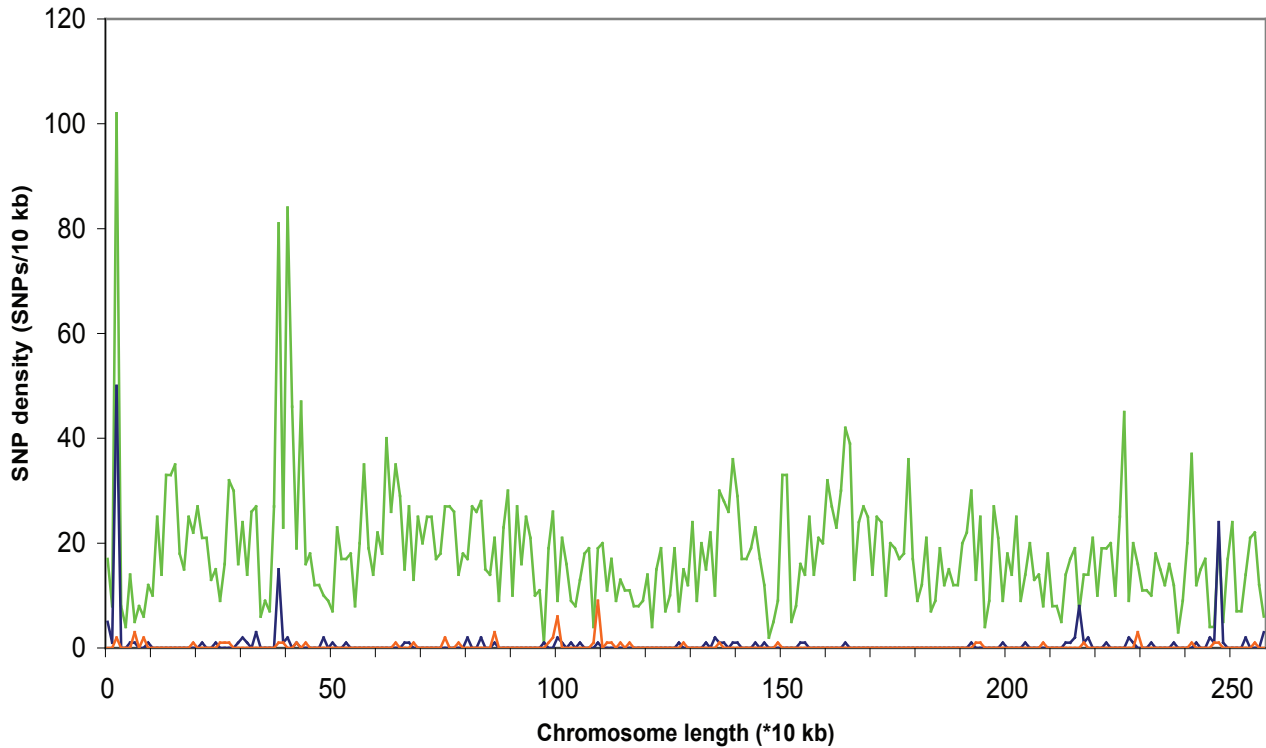

# Chromosome V

- Type II
- Type III
- New SNPs

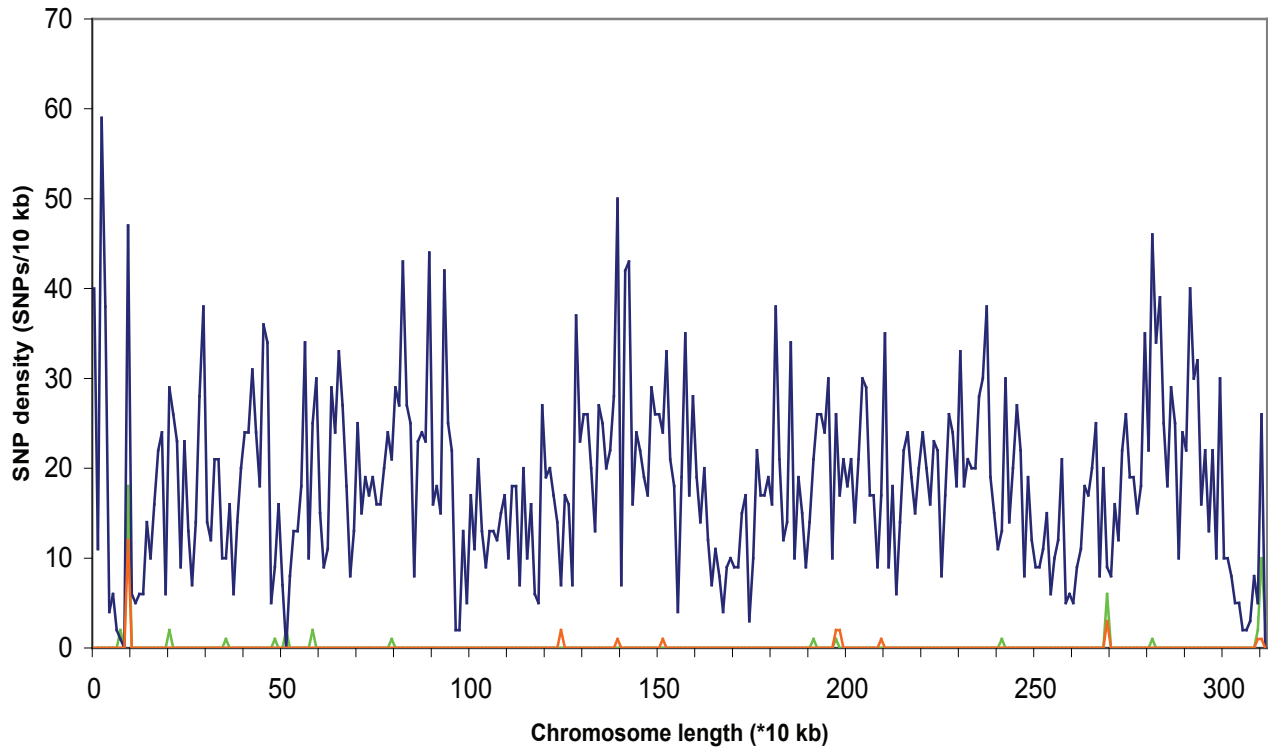

# Chromosome VI

- Type II
- Type III
- New SNPs

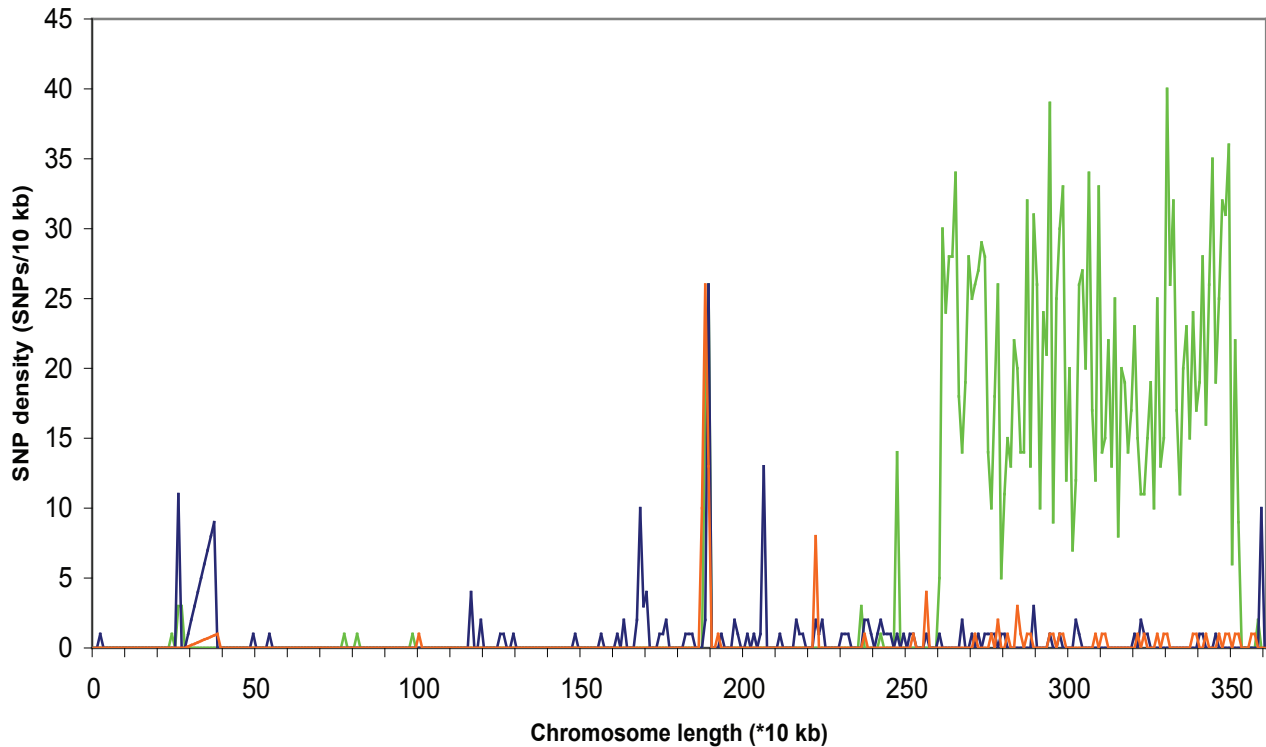



# Chromosome VIIa

- Type II
- Type III
- New SNPs

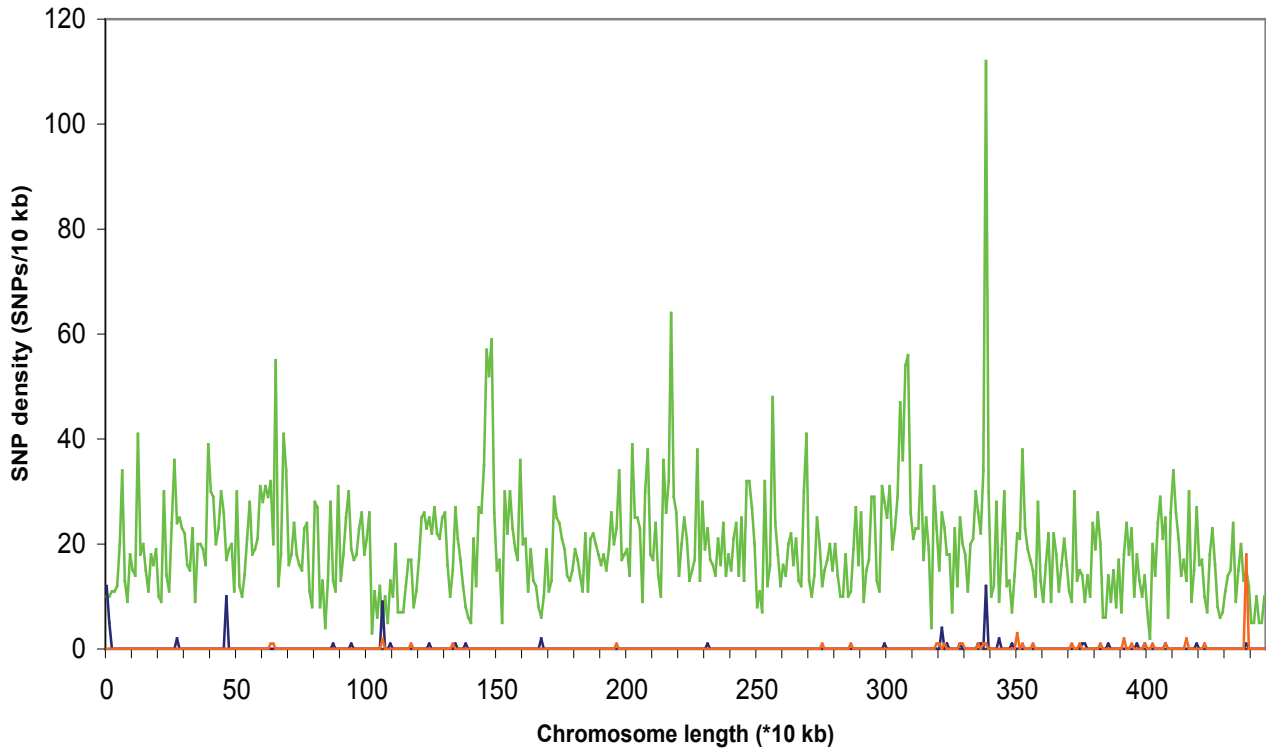

# Chromosome VIIb

- Type II
- Type III
- New SNPs

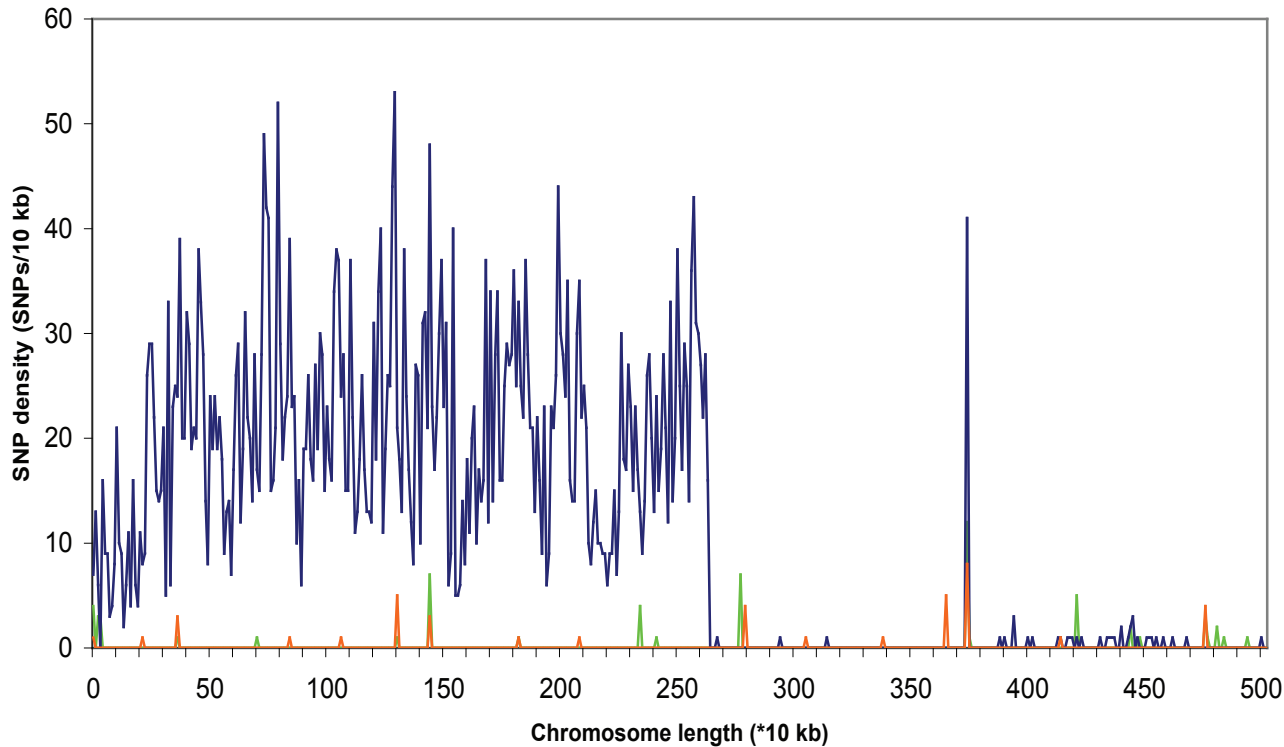

# Chromosome VIII

- Type II
- Type III
- New SNPs

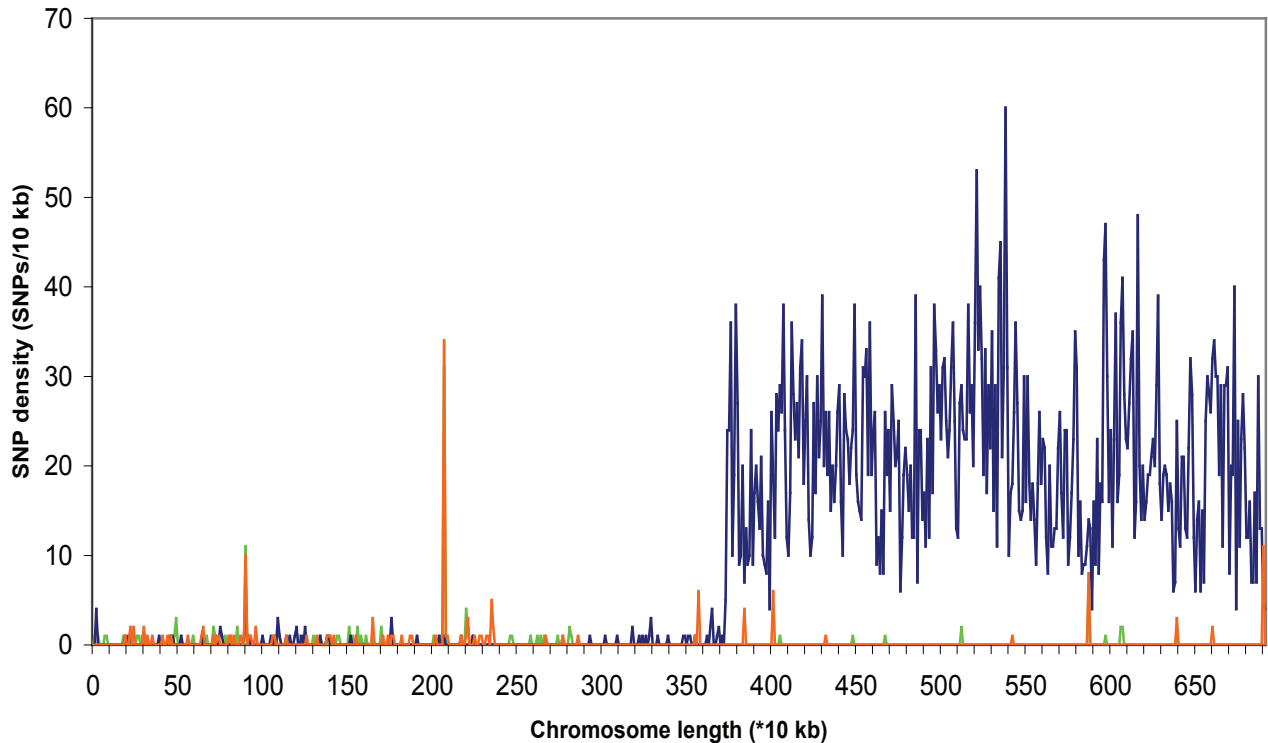

# Chromosome IX

- Type II
- Type III
- New SNPs

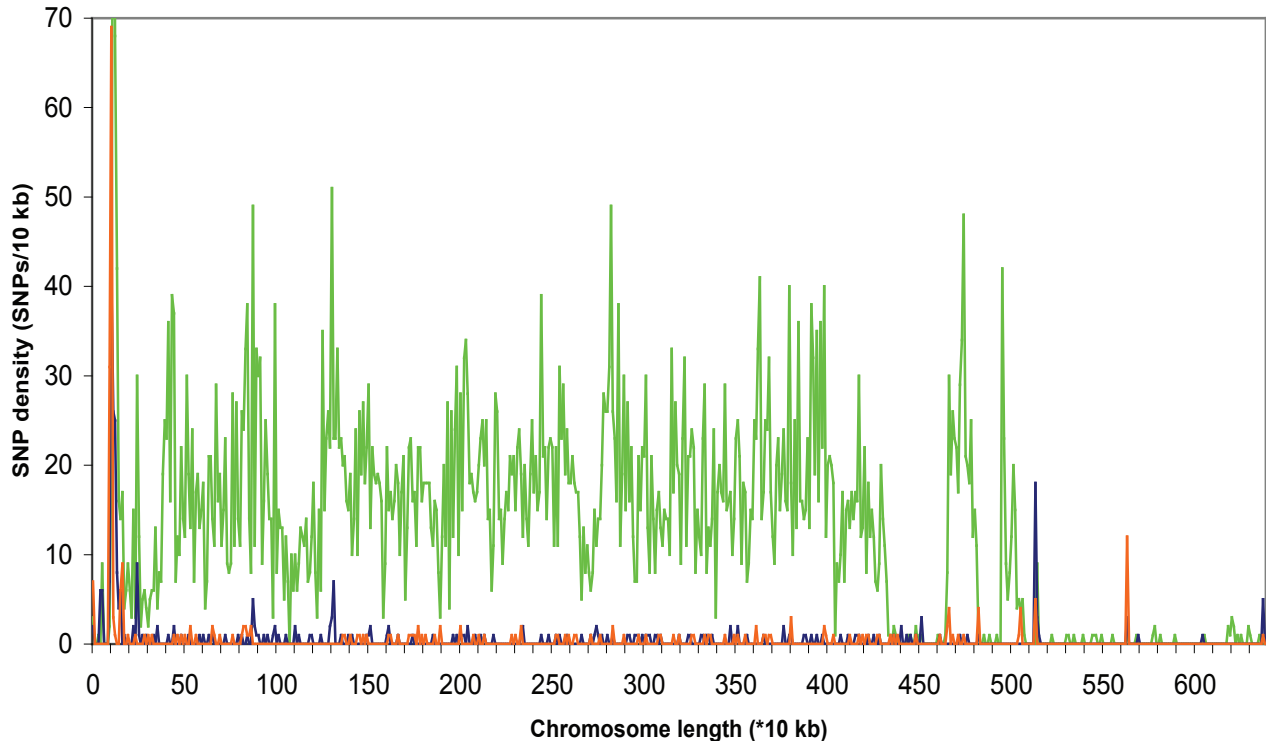

# Chromosome X

- Type II
- Type III
- New SNPs

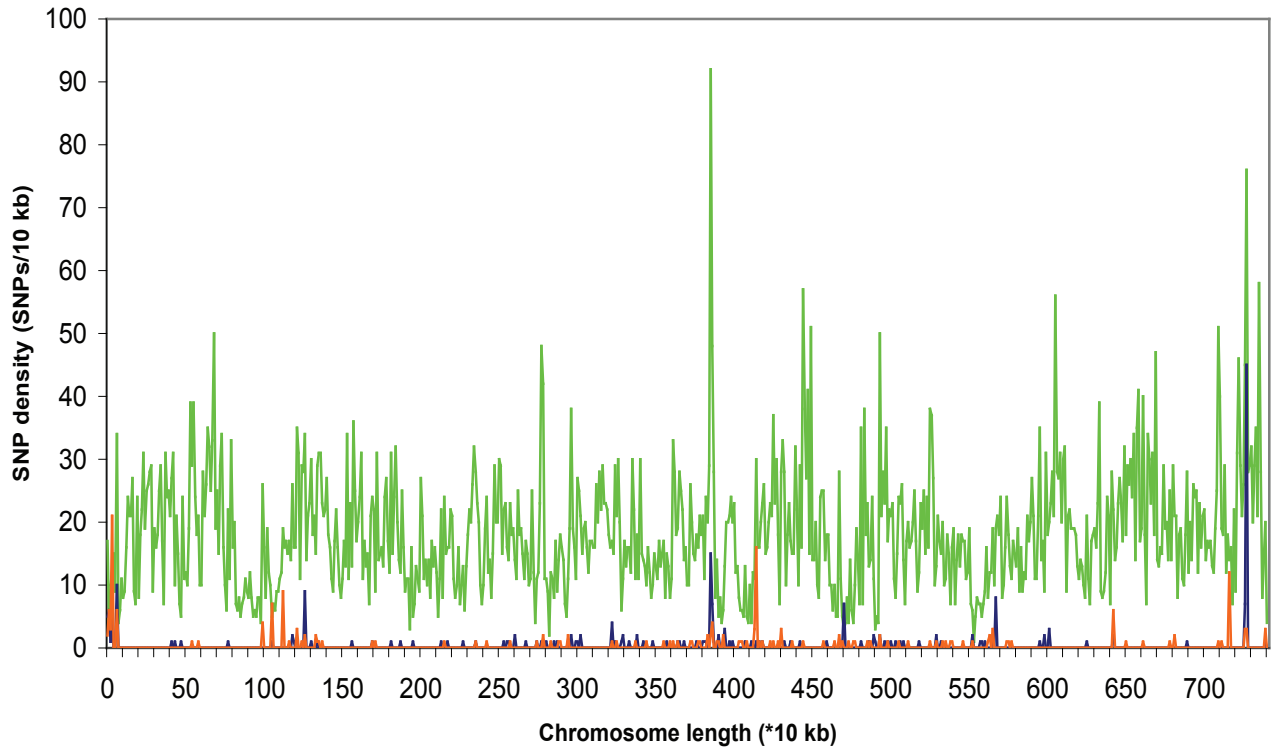

# Chromosome XI

- Type II
- Type III
- New SNPs

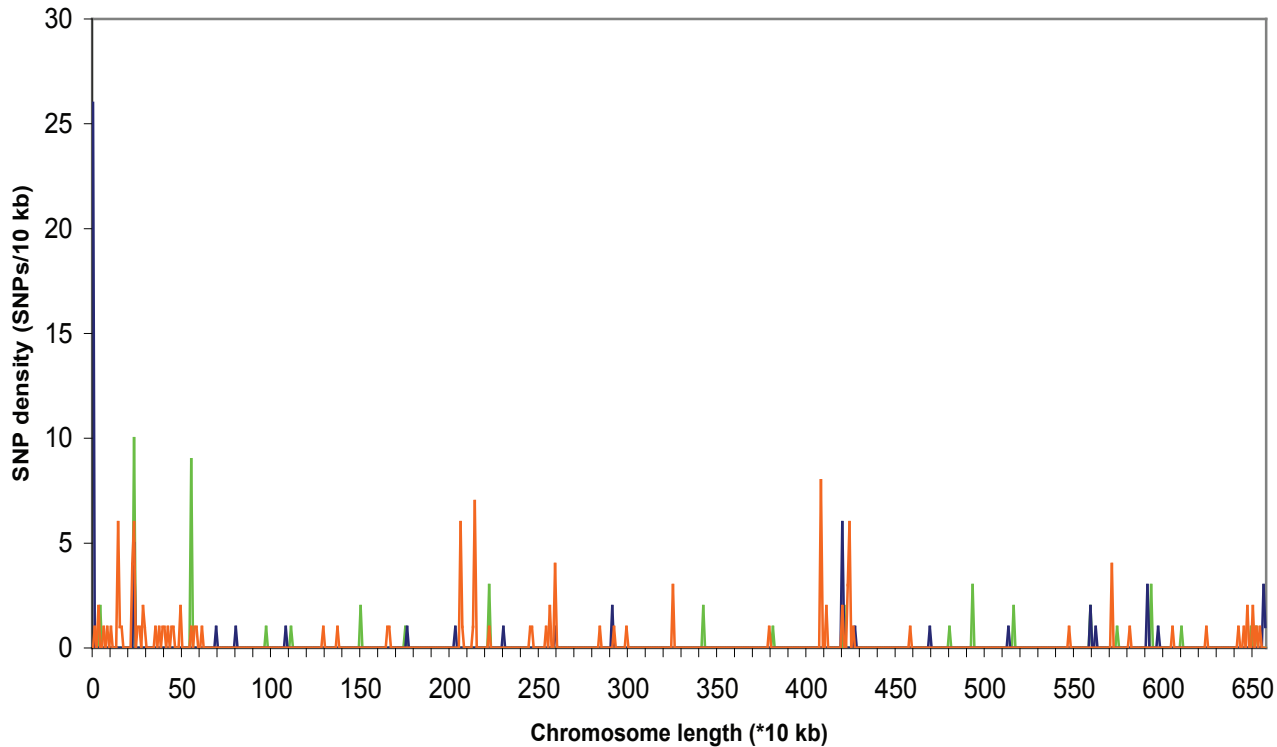

# Chromosome XII

- Type II
- Type III
- New SNPs

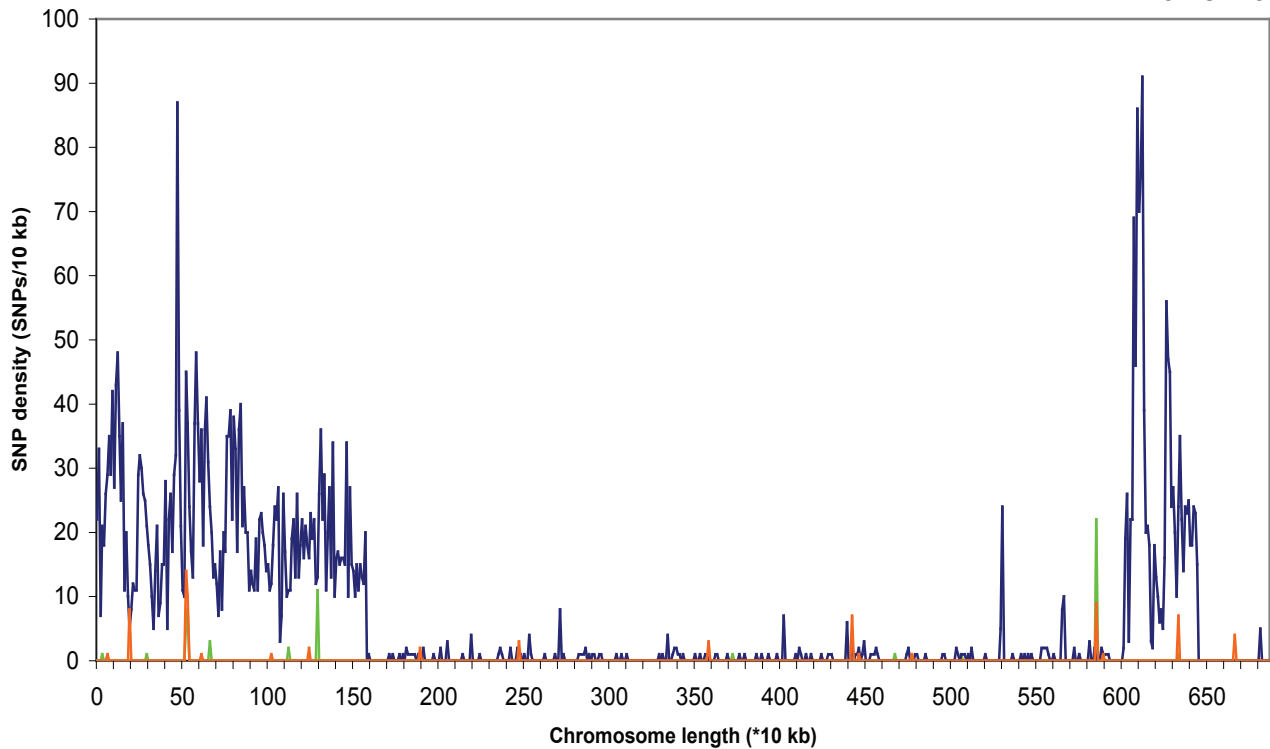

Supplement: gb-2009-10-5-r53-S1.pdf [file gb-2009-10-5-r53-S1.pdf]
