# Supplementary material for: Whole genome sequencing of a natural recombinant Toxoplasma gondii strain reveals chromosome sorting and local allelic variants
Source: PubMed Central journal article supplement (PMC2718519; doi:10.1186/gb-2009-10-5-r53), 2009-05-20

## Additional data file 2

Overlay pictures for all 14 chromosomes comparing the SNP patterns in the 3 reference *Toxoplasma* strains to those in TgCkUg2. Graphs were constructed as described in Figure 2. Y-axis scales are not shown but range from 1500 for Chr. Ia and Ib to 16000 for Chr. X. For Chr. VIIa, in the reference strains type III SNPs dominate for the first 0.5 Mb, which is illustrated by the descending grey line. However, since TgCkUg2 acquired this entire chromosome from the type II parent, TgCkUg2 has the type II allele at all polymorphic sites in this region (indicated by the green lines).

In regions where type I SNPs dominate in the reference strains, types II and III are highly similar, and the lack of major SNPs in TgCkUg2 corresponds to the regions where the grey line is flat. This correlation is obvious for the larger regions in Ib, VI, VIIb, VIII, XI and XII, but can also be seen in more detail for several short regions, for example on chromosome IX (in the very beginning and around 4.5 Mb and 4.9 Mb on the X-axis). This close match between these two sets of data strengthens the notion of TgCkUg2 being the progeny of two strains which are highly similar to the archetypal type II and III.

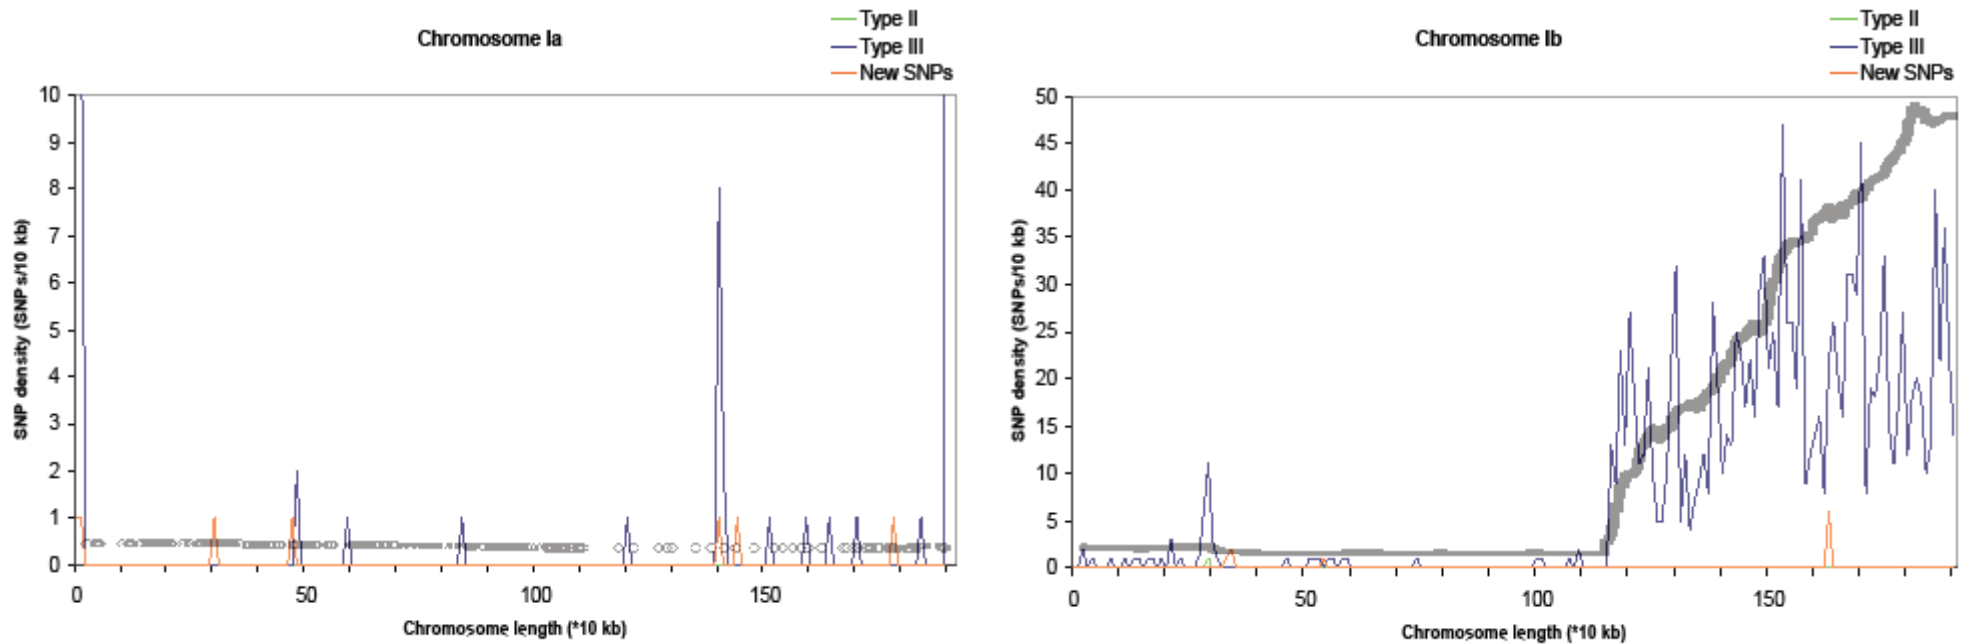

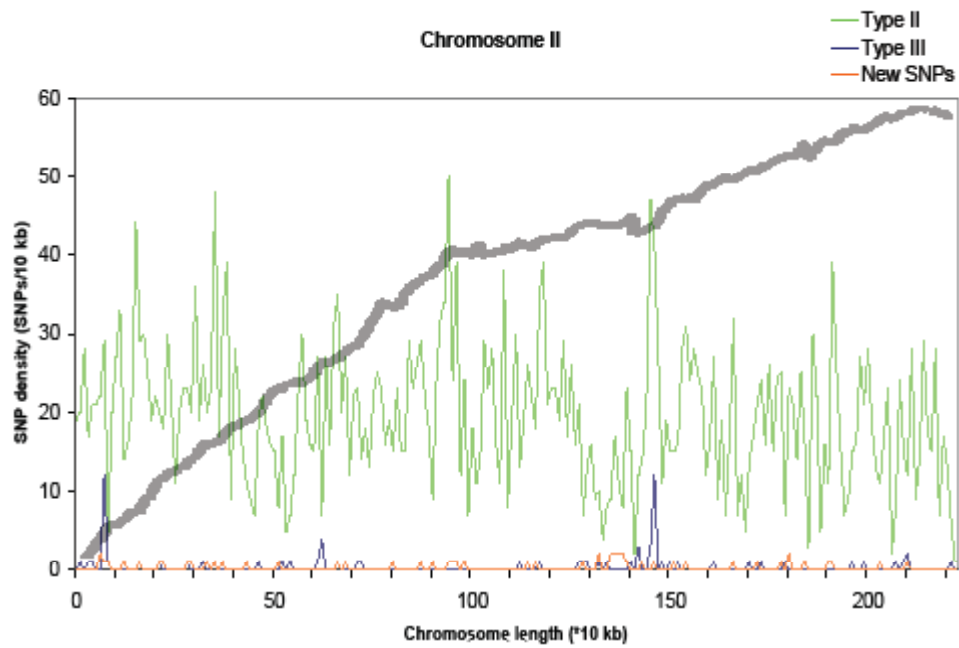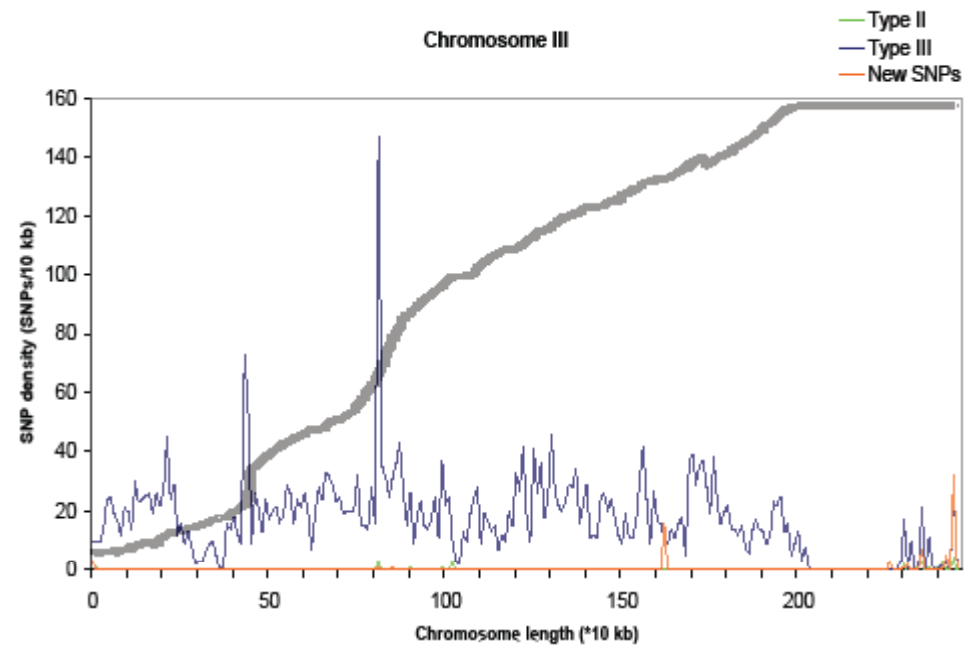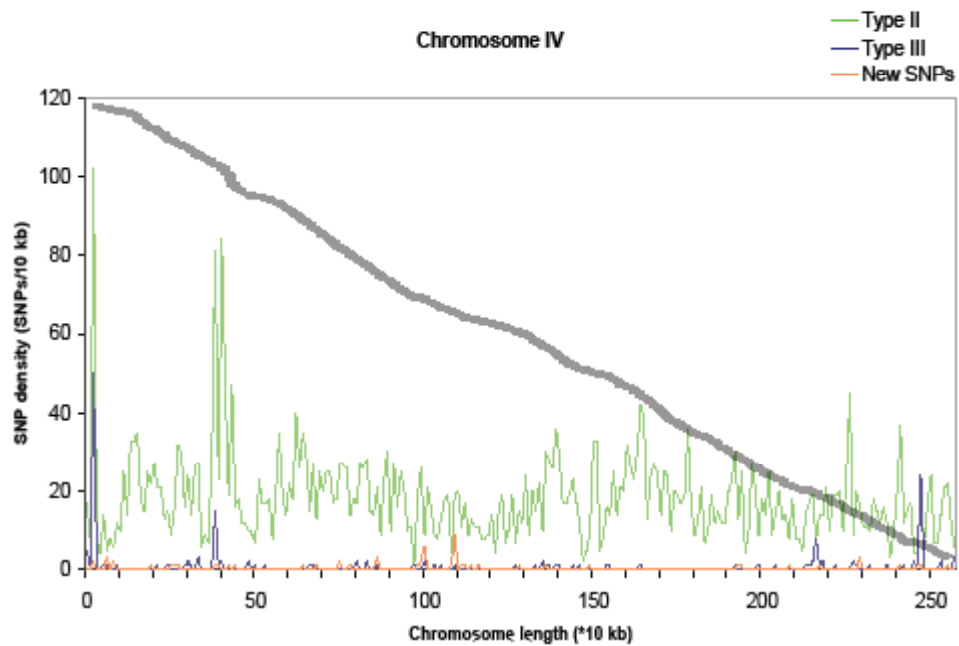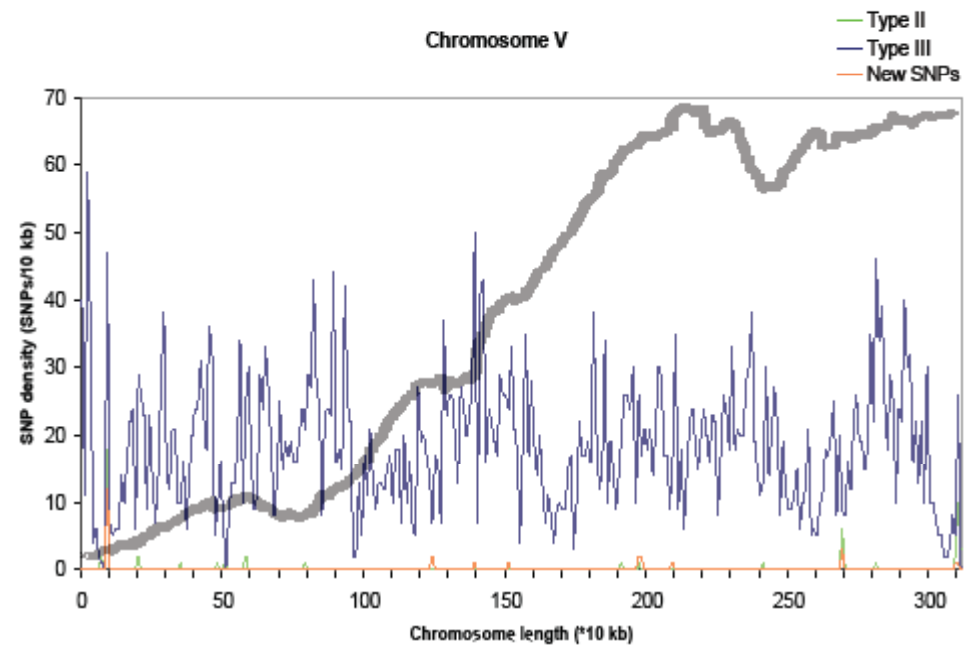

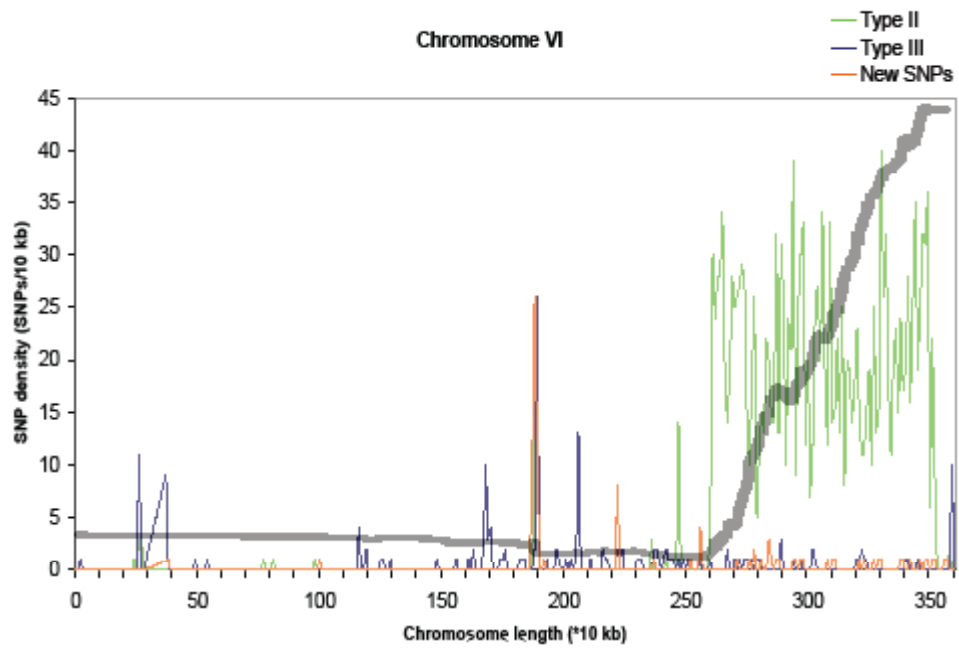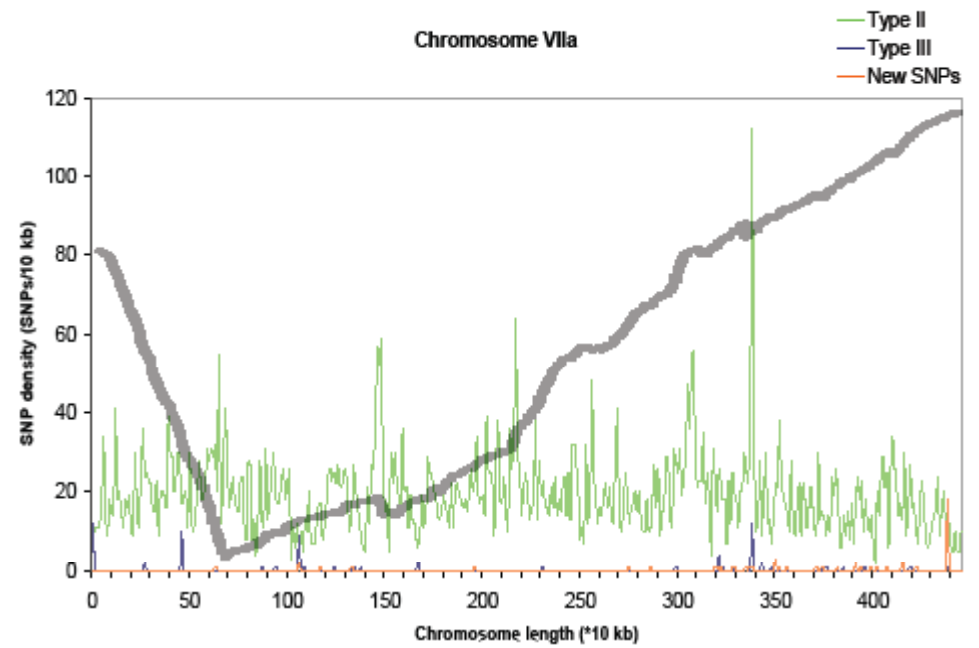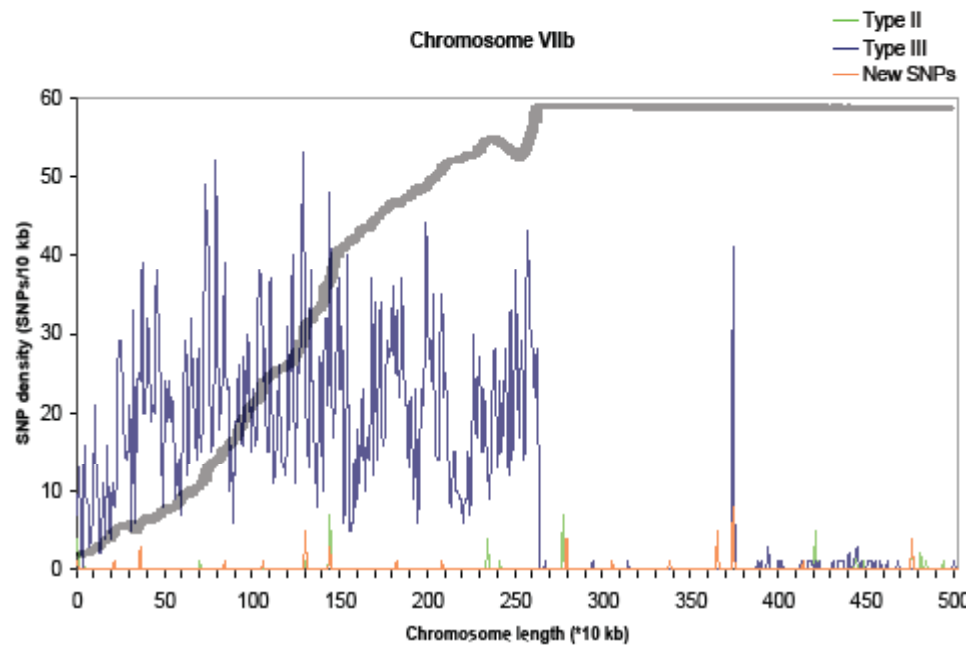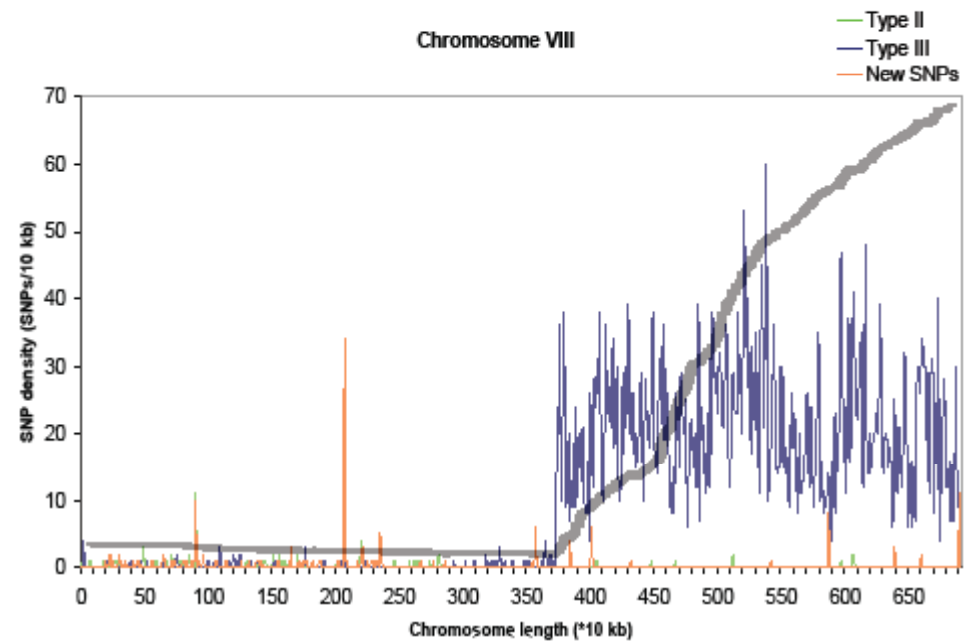

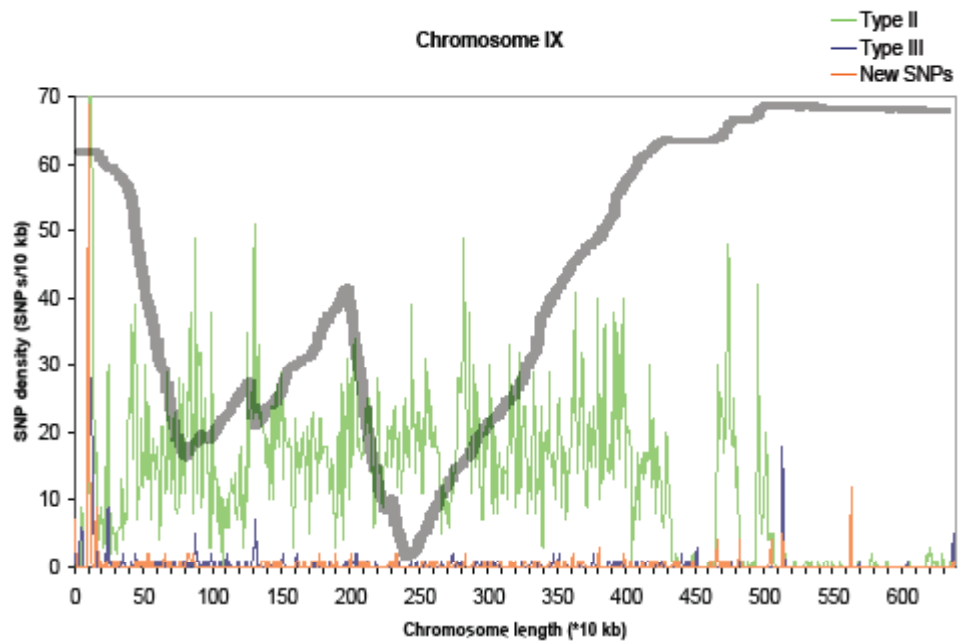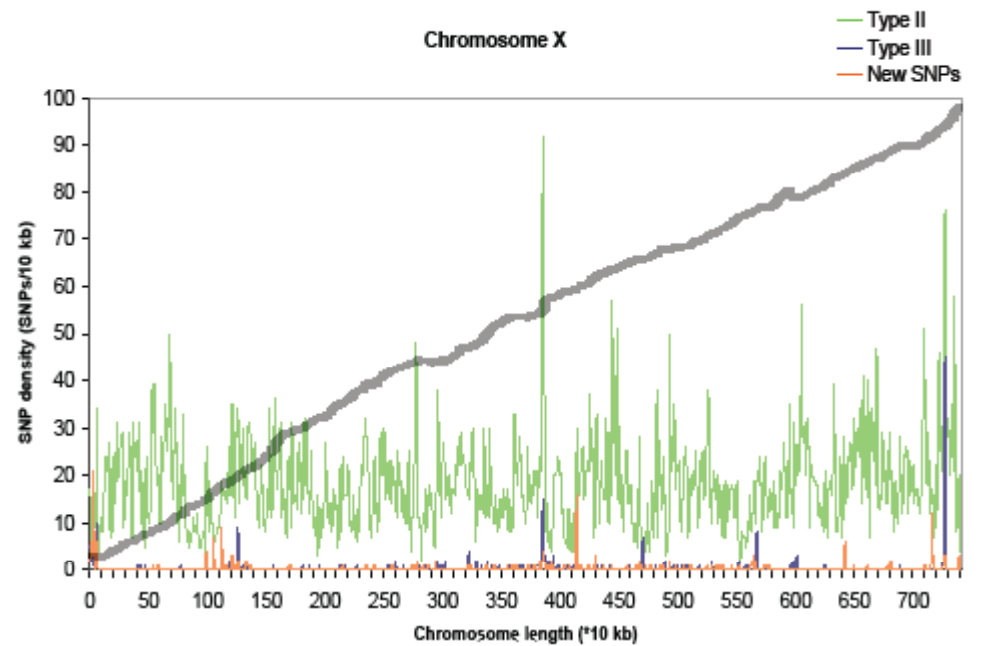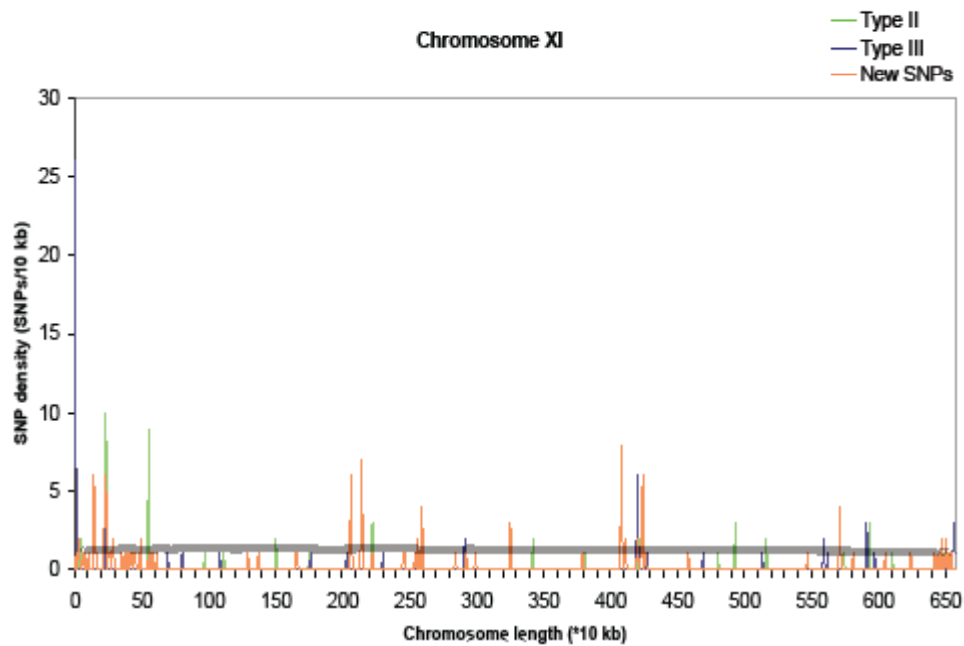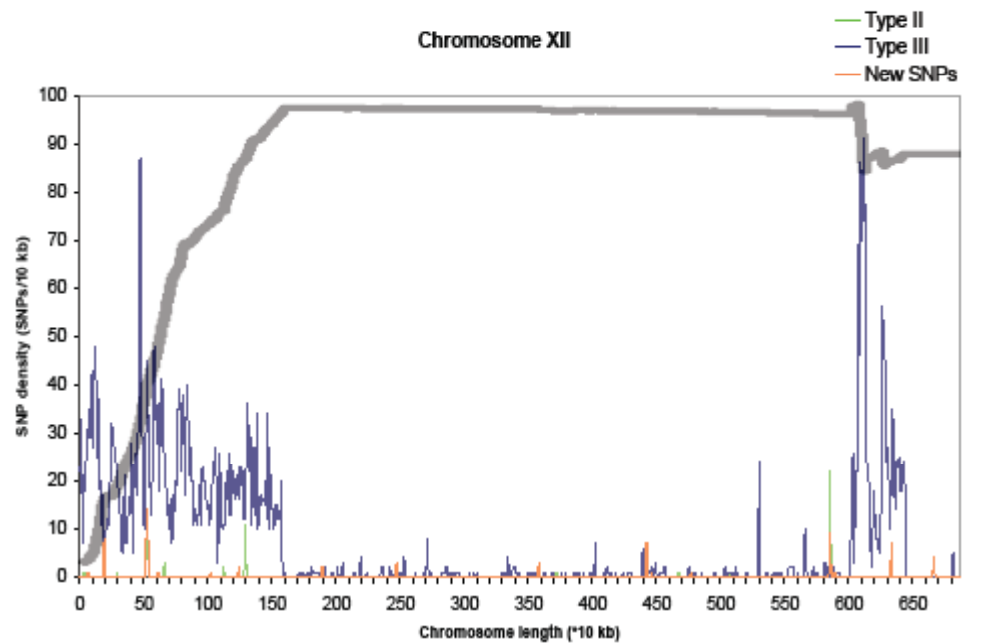

Supplement: gb-2009-10-5-r53-S2.pdf [file gb-2009-10-5-r53-S2.pdf]
