# Supplementary material for: Whole genome sequencing of a natural recombinant Toxoplasma gondii strain reveals chromosome sorting and local allelic variants
Source: PubMed Central journal article supplement (PMC2718519; doi:10.1186/gb-2009-10-5-r53), 2009-05-20
Supplement: gb-2009-10-5-r53-S3.pdf [file gb-2009-10-5-r53-S3.pdf]

### Additional data file 3. Results of Maximum Likelihood analysis of all 14 chromosomes

For each chromosome, compared

- (i) Me49 with VEG,
- (ii) Me49 with TgCkUg2,
- (iii) VEG with TgCkUg2.

Pairwise comparisons, where omega (dN/dS) is significantly greater than 1.

| Genomic Location               | Strain1 | Strain2 | Gene       | Product description                 | Omega    | Kappa  | t     | x  | <sup>^</sup> x | NxdN   | SxdS   | P             |
|--------------------------------|---------|---------|------------|-------------------------------------|----------|--------|-------|----|----------------|--------|--------|---------------|
| Ia: 1,403,087 - 1,410,897 (-)  | Me49    | TgCkUg2 | 83.m02145  | ROP7                                | infinity | 2.432  | 0.006 | 6  | 6.0            | 5.975  | 0.000  | 0.025<P<0.050 |
| III: 25,847 - 26,506 (-)       | Me49    | VEG     | 64.m00739  | hypothetical protein                | infinity | 11.339 | 0.028 | 5  | 5.1            | 5.058  | 0.019  | 0.025<P<0.050 |
| III: 381,515 - 382,947 (-)     | Me49    | VEG     | 52.m03454  | hypothetical protein                | 5.654    | 2.785  | 0.036 | 13 | 13.1           | 12.178 | 1.022  | 0.025<P<0.050 |
| III: 813,521 - 817,895 (+)     | Me49    | VEG     | 52.m02683  | hypothetical protein conserved      | 3.004    | 1.204  | 0.323 | 74 | 81.8           | 71.510 | 10.296 | 0.000<P<0.005 |
| III: 1,087,221 - 1,087,724 (-) | Me49    | VEG     | 52.m03445  | hypothetical protein                | infinity | 11.214 | 0.030 | 5  | 5.1            | 5.052  | 0.037  | 0.025<P<0.050 |
| III: 1,478,244 - 1,485,871 (+) | Me49    | VEG     | 52.m02694  | hypothetical protein                | 1.785    | 3.470  | 0.041 | 66 | 66.9           | 52.683 | 14.187 | 0.025<P<0.050 |
| III: 1,899,140 - 1,900,667 (+) | Me49    | VEG     | 52.m00002  | GRA8                                | 3.238    | 2.391  | 0.061 | 16 | 16.4           | 13.294 | 3.060  | 0.025<P<0.050 |
| IV: 339,190 - 340,818 (-)      | Me49    | VEG     | 641.m03163 | hypothetical protein                | 3.071    | 0.621  | 0.071 | 37 | 38.5           | 31.419 | 7.149  | 0.000<P<0.005 |
| IV: 403,574 - 405,865 (-)      | Me49    | VEG     | 641.m01562 | bradyzoite-specific surface protein | 2.901    | 1.843  | 0.188 | 71 | 74.9           | 65.550 | 9.268  | 0.000<P<0.005 |
| IV: 940,527 - 951,403 (+)      | VEG     | TgCkUg2 | 641.m01516 | hypothetical protein                | infinity | 2.095  | 0.006 | 10 | 10.0           | 9.928  | 0.000  | 0.005<P<0.010 |
| IV: 2,471,604 - 2,473,019 (+)  | Me49    | VEG     | 48.m00093  | hypothetical protein                | 2.281    | 1.612  | 0.101 | 46 | 47.5           | 39.185 | 8.273  | 0.025<P<0.050 |
| V: 243,458 - 246,171 (-)       | Me49    | VEG     | 39.m00623  | proline-rich protein                | 3.955    | 3.380  | 0.062 | 32 | 32.7           | 28.693 | 4.062  | 0.000<P<0.005 |
| V: 243,458 - 246,171 (-)       | Me49    | TgCkUg2 | 39.m00623  | proline-rich protein                | infinity | 12.546 | 0.013 | 7  | 7.0            | 6.997  | 0.059  | 0.010<P<0.025 |
| V: 941,849 - 942,772 (+)       | Me49    | VEG     | 31.m01829  | hypothetical protein                | infinity | 2.788  | 0.030 | 9  | 9.1            | 9.038  | 0.031  | 0.005<P<0.010 |

| Genomic Location                | Strain1 | Strain2 | Gene      | Product description                            | Omega    | Kappa    | t     | x   | ^x    | NxdN    | SxdS   | P             |
|---------------------------------|---------|---------|-----------|------------------------------------------------|----------|----------|-------|-----|-------|---------|--------|---------------|
| V: 1,291,001 - 1,292,655 (-)    | Me49    | TgCkUg2 | 31.m01816 | iron-sulfur cluster assembly accessory protein | infinity | 1.262    | 0.016 | 8   | 8.1   | 8.041   | 0.048  | 0.010<P<0.025 |
| V: 1,927,848 - 1,928,810 (+)    | Me49    | VEG     | 76.m01639 | hypothetical protein                           | infinity | 12.644   | 0.019 | 6   | 6.1   | 6.024   | 0.036  | 0.010<P<0.025 |
| V: 1,991,460 - 1,993,181 (-)    | Me49    | VEG     | 76.m01634 | hypothetical protein                           | infinity | infinity | 0.022 | 5   | 5.1   | 5.053   | 0.024  | 0.025<P<0.050 |
| V: 3,018,505 - 3,027,457 (+)    | Me49    | TgCkUg2 | 76.m01544 | hypothetical protein                           | infinity | 1.163    | 0.003 | 9   | 9.1   | 9.263   | 0.000  | 0.010<P<0.025 |
| VI: 1,898,443 - 1,907,404 (-)   | Me49    | VEG     | 49.m03279 | hypothetical protein                           | infinity | 3.226    | 0.003 | 7   | 7.1   | 6.805   | 0.000  | 0.010<P<0.025 |
| VI: 2,460,809 - 2,469,031 (-)   | Me49    | VEG     | 49.m03334 | BRCA2 repeat-containing protein                | 6.401    | 4.626    | 0.005 | 13  | 13.2  | 11.801  | 1.142  | 0.010<P<0.025 |
| VI: 2,873,689 - 2,875,327 (-)   | Me49    | VEG     | 49.m03376 | hypothetical protein                           | infinity | 2.073    | 0.064 | 8   | 8.2   | 8.211   | 0.031  | 0.025<P<0.050 |
| VI: 2,873,689 - 2,875,327 (-)   | VEG     | TgCkUg2 | 49.m03376 | hypothetical protein                           | infinity | 1.551    | 0.056 | 7   | 7.2   | 7.155   | 0.029  | 0.025<P<0.050 |
| VI: 2,926,773 - 2,929,809 (-)   | VEG     | TgCkUg2 | 49.m03382 | hypothetical protein                           | infinity | 14.508   | 0.015 | 7   | 7.1   | 6.990   | 0.048  | 0.010<P<0.025 |
| VI: 3,402,642 - 3,409,705 (+)   | VEG     | TgCkUg2 | 49.m03431 | hypothetical protein                           | infinity | 3.547    | 0.006 | 8   | 8.0   | 7.904   | 0.000  | 0.010<P<0.025 |
| VIIa: 1,745,401 - 1,749,423 (-) | Me49    | VEG     | 20.m03866 | hypothetical protein                           | infinity | 11.816   | 0.016 | 6   | 6.1   | 5.988   | 0.041  | 0.010<P<0.025 |
| VIIa: 2,567,900 - 2,570,402 (+) | Me49    | VEG     | 20.m00005 | GRA7 ATP-dependent Clp protease                | 5.150    | 1.108    | 0.066 | 16  | 16.3  | 15.323  | 1.006  | 0.025<P<0.050 |
| VIIa: 2,589,211 - 2,595,538 (+) | Me49    | VEG     | 20.m03783 | proteolytic subunit                            | 5.783    | 5.691    | 0.037 | 11  | 11.2  | 10.170  | 1.018  | 0.025<P<0.050 |
| VIIa: 3,945,304 - 3,950,401 (-) | Me49    | VEG     | 20.m03985 | megakaryocyte stimulating factor               | 3.019    | 1.375    | 0.108 | 128 | 133.7 | 118.588 | 15.245 | 0.000<P<0.005 |
| VIIb: 481,603 - 484,899 (+)     | Me49    | VEG     | 55.m08200 | hypothetical protein                           | 6.623    | 3.524    | 0.014 | 15  | 15.1  | 14.172  | 1.044  | 0.010<P<0.025 |
| VIIb: 1,544,716 - 1,546,334 (-) | Me49    | VEG     | 55.m04955 | hypothetical protein                           | infinity | 2.001    | 0.103 | 13  | 13.5  | 13.437  | 0.055  | 0.000<P<0.005 |
| VIII: 5,386,572 - 5,387,878 (-) | Me49    | TgCkUg2 | 59.m07776 | conserved hypothetical protein                 | infinity | 4.882    | 0.035 | 6   | 6.1   | 6.059   | 0.035  | 0.025<P<0.050 |
| VIII: 6,692,379 - 6,704,572 (+) | Me49    | TgCkUg2 | 59.m03361 | 200 kDa antigen p200-related                   | 4.325    | 3.437    | 0.007 | 21  | 21.1  | 19.042  | 1.893  | 0.010<P<0.025 |
| VIII: 6,882,242 - 6,886,119 (+) | Me49    | VEG     | 8.m00192  | hypothetical protein                           | infinity | 3.765    | 0.006 | 6   | 6.0   | 6.053   | 0.000  | 0.025<P<0.050 |

| Genomic Location              | Strain1 | Strain2 | Gene       | Product description                         | Omega    | Kappa    | t     | x  | ^x   | NxdN   | SxdS  | P             |
|-------------------------------|---------|---------|------------|---------------------------------------------|----------|----------|-------|----|------|--------|-------|---------------|
| IX: 1,785,965 - 1,789,313 (+) | Me49    | VEG     | 57.m00014  | co-chaperone GrpE                           | infinity | 4.131    | 0.013 | 6  | 6.1  | 5.968  | 0.044 | 0.025<P<0.050 |
| IX: 3,576,654 - 3,579,197 (-) | Me49    | VEG     | 80.m03974  | hypothetical protein                        | infinity | 5.218    | 0.011 | 9  | 9.1  | 8.935  | 0.082 | 0.005<P<0.010 |
| IX: 6,373,197 - 6,374,206 (-) | Me49    | VEG     | 541.m01251 | hypothetical protein                        | infinity | 3.415    | 0.048 | 8  | 8.2  | 8.131  | 0.029 | 0.010<P<0.025 |
| X: 61,766 - 62,728 (-)        | Me49    | TgCkUg2 | 42.m07434  | hypothetical protein lytB domain-containing | infinity | 2.437    | 0.047 | 8  | 8.1  | 8.090  | 0.030 | 0.010<P<0.025 |
| X: 894,498 - 898,809 (-)      | VEG     | TgCkUg2 | 42.m03570  | protein                                     | infinity | 2.809    | 0.007 | 5  | 5.1  | 4.960  | 0.000 | 0.025<P<0.050 |
| X: 991,698 - 993,865 (-)      | VEG     | TgCkUg2 | 42.m00013  | GRA3                                        | infinity | 1.855    | 0.041 | 9  | 9.1  | 9.114  | 0.036 | 0.010<P<0.025 |
| X: 3,621,460 - 3,621,966 (-)  | Me49    | VEG     | 42.m07410  | hypothetical protein                        | infinity | 1.618    | 0.043 | 7  | 7.2  | 7.140  | 0.033 | 0.010<P<0.025 |
| X: 3,939,372 - 3,940,433 (-)  | Me49    | VEG     | 28.m00550  | hypothetical protein                        | 6.691    | infinity | 0.035 | 12 | 12.2 | 11.274 | 0.990 | 0.010<P<0.025 |
| X: 4,579,251 - 4,584,450 (+)  | Me49    | VEG     | 46.m00012  | hypothetical protein                        | 10.316   | 3.901    | 0.048 | 21 | 21.4 | 20.395 | 0.988 | 0.000<P<0.005 |
| X: 5,503,600 - 5,505,578 (-)  | Me49    | VEG     | 46.m01717  | hypothetical protein                        | infinity | 2.264    | 0.028 | 6  | 6.1  | 6.030  | 0.018 | 0.025<P<0.050 |
| X: 5,689,815 - 5,698,810 (-)  | VEG     | TgCkUg2 | 46.m02909  | hypothetical protein                        | infinity | 7.159    | 0.004 | 5  | 4.9  | 5.092  | 0.000 | 0.025<P<0.050 |
| X: 5,982,119 - 5,986,510 (+)  | Me49    | VEG     | 33.m01261  | protein                                     | 4.489    | 1.440    | 0.016 | 22 | 22.1 | 20.227 | 2.032 | 0.010<P<0.025 |
| X: 7,213,002 - 7,216,378 (-)  | Me49    | VEG     | 63.m00002  | GRA6                                        | 5.838    | 2.605    | 0.059 | 13 | 13.3 | 12.288 | 0.998 | 0.025<P<0.050 |
| XII: 137,376 - 141,329 (+)    | Me49    | TgCkUg2 | 145.m00337 | hypothetical protein                        | 6.527    | 1.663    | 0.009 | 12 | 12.1 | 10.944 | 1.025 | 0.010<P<0.025 |
| XII: 517,164 - 523,223 (+)    | Me49    | TgCkUg2 | 551.m00237 | hypothetical protein                        | infinity | infinity | 0.004 | 4  | 4.0  | 4.018  | 0.000 | 0.025<P<0.050 |

Key:

- omega dN/dS ratio.
- kappa transversion/transition rate ratio.
- t Sequence distance (codon substitutions per codon).
- x Observed nucleotide substitutions (i.e., number of SNPs detected between II and III).
- ^x Estimated nucleotide substitutions, after correction for multiple hits.
- NxdN Estimated number of non-synonymous nucleotide substitutions.
- SxdS Estimated number of synonymous nucleotide substitutions.
- P Outcome of LRT analysis showing how significantly different omega is from 1.

Procedure applied to each chromosome, in more detail:

- =====
- 1) Protein coding DNA extracted from Me49 chromosome.
  - 2) Equivalent DNA sequences for VEG, generated from Me49 using Me49 vs VEG SNP data.
  - 3) Equivalent DNA sequences for TgCkUg2, generated from (i) Me49, and (ii) VEG (which is itself generated from Me49).
  - 4) For each gene, compared:
    - (i) Me49 coding sequence with equivalent VEG sequence (generated from Me49),
    - (ii) Me49 coding sequence with equivalent TgCkUg2 (generated from Me49),
    - (iii) VEG coding sequence with equivalent TgCkUg2 (generated from VEG).

Each comparison involved (i) maximum likelihood (ML) pairwise comparison to estimate dN/dS (omega), (ii) an equivalent ML comparison, but with omega fixed at 1, (iii) a likelihood ratio test (LRT) to assess whether the estimated omega was significantly greater than 1.

In all cases, ML analysis was carried out according to Goldman and Yang (1994) as implemented in the codeml program within the Paml (version 4b) package. Model assumed was:

- All 61 codon frequencies calculated separately (F61).
- Kappa (transition/transversion rate ratio) estimated.
